# Supplementary material
Source: PubMed Central journal article supplement (PMC5866609)
Supplement: pnas.201800195SI.pdf [file pnas.201800195SI.pdf]

**Table S1. Data collection and refinement statistics**

| Parameter                               | Value                |
|-----------------------------------------|----------------------|
| Data collection                         |                      |
| Space group                             | $P2_12_12_1$         |
| Cell dimensions                         |                      |
| <i>a</i> , <i>b</i> , <i>c</i> , Å      | 53.0, 100.0, 232.1   |
| $\alpha$ , $\beta$ , $\gamma$ , °       | 90, 90, 90           |
| X-ray source                            | AUS MX2              |
| $\lambda$ , Å                           | 0.954                |
| Detector                                | ADSC Quantum 315r    |
| Resolution range, Å                     | 50–2.15 (2.23–2.15)* |
| Observed reflections                    | 284,545              |
| Unique reflections                      | 63,285               |
| Completeness, %                         | 93.0 (94.8)          |
| Multiplicity                            | 4.5 (4.4)            |
| $\langle I/\sigma(I) \rangle$           | 8.6 (1.6)            |
| $R_{\text{merge}}$ , %                  | 14.3 (80.0)          |
| $R_{\text{pim}}$ , %                    | 7.2 (41.1)           |
| Refinement                              |                      |
| Reflections in working set <sup>†</sup> | 47,878               |
| Reflections in test set                 | 2,561                |
| Protomers (SdhAE complexes) per ASU     | 2                    |
| $R_{\text{work}}$ , %                   | 19.9 (26.0)          |
| $R_{\text{free}}$ , %                   | 25.8 (28.0)          |
| rmsd bond lengths, Å                    | 0.009                |
| rmsd bond angles, °                     | 1.39                 |
| <i>B</i> factors, Å <sup>2</sup>        |                      |
| SdhA                                    | 15                   |
| SdhE                                    | 18                   |
| Ramachandran <sup>‡</sup>               |                      |
| Favored, %                              | 97.64                |
| Allowed, %                              | 2.20                 |
| Outliers, %                             | 0.16                 |
| PDB ID code                             | 6C12                 |

\*Values in parenthesis are for highest-resolution shell.

<sup>†</sup>Following anisotropic correction of data (1).

<sup>‡</sup>Calculated using MolProbity (2).

1. Strong M, et al. (2006) Toward the structural genomics of complexes: Crystal structure of a PE/PPE protein complex from *Mycobacterium tuberculosis*. *Proc Natl Acad Sci USA* 103:8060–8065.
2. Chen VB, et al. (2010) MolProbity: All-atom structure validation for macromolecular crystallography. *Acta Crystallogr D Biol Crystallogr* 66:12–21.

**Table S2. Distances between the covalent FAD cofactor and structural elements putatively involved in covalent flavinylation**

| Protein                         | Base, Å (proton abstraction, C8 methyl group) | N1-C <sub>2</sub> =O <sub>2</sub> stabilization | Amide near N5 (Å) |
|---------------------------------|-----------------------------------------------|-------------------------------------------------|-------------------|
| Bovine complex (II)*            | His365 N $\delta$ 1-C8 $\alpha$ (4.4)         | Helix dipole (residues 415–429)                 | Gln62 NH (3.4)    |
| SQR <i>E. coli</i> <sup>†</sup> | His354 N $\delta$ 1-C8 $\alpha$ (4.0)         | Helix dipole (residues 405–419)                 | Gln50 NH (3.1)    |
| SdhAE complex <sup>‡</sup>      | His354 N $\delta$ 1-C8 $\alpha$ (4.2)         | Helix dipole (residues 405–419)                 | Gln50 NH (4.4)    |

\*PDB ID code 1ZOY (1).

<sup>†</sup>PDB ID code 2WDQ (2).

<sup>‡</sup>This work.

1. Sun F, et al. (2005) Crystal structure of mitochondrial respiratory membrane protein complex II. *Cell* 121:1043–1057.
2. Ruprecht J, Yankovskaya V, Maklashina E, Iwata S, Cecchini G (2009) Structure of *Escherichia coli* succinate:quinone oxidoreductase with an occupied and empty quinone-binding site. *J Biol Chem* 284:29836–29846.
